# Supplementary material
Source: HighWire-hosted journal article supplement (https://bmjopen.bmj.com/content/14/12/e086102)
Supplement: inline-supplementary-material-1 [file inline-supplementary-material-1.pdf]

## SUPPLEMENTAL MATERIAL

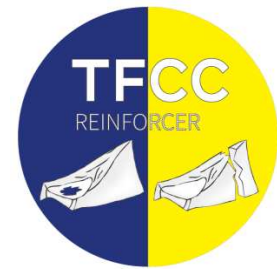

This appendix provides readers with additional information about the authors' work.

Supplement to:

**tREatment of triangular FibrOcartilage ComplEx Ruptures (REINFORCER):  
Protocol for Randomised, Controlled, Blinded, Efficacy Trial of Triangular  
Fibrocartilage Complex Tears**

Authors:

Kaivorinne and Räisänen MP, Karjalainen T, Jokihaara J, Gvozdenovic R, Wilcke M, Reito A, Anttila T, Pönkkö A, Lauridsen C, Tanskanen T, Mattila VM and REINFORCER investigators\*

\*REINFORCER investigators:

Matti Juntunen, Olli-Pekka Kangasniemi, Morten Kjaer, Toni Luukkala, Patrick Luukinen, Heli Lähdeniemi, Panu Nordback, Shabir Rashidi, Janne Soikkeli, Jerzy Stiasny, Elin Sward, Lars Vadstrup, Johanna Vonkieseritzky

24    [Table of Contents](#)

25

26    Table S1. Palmer’s classification for TFCC ruptures ..... 3

27    Table S2. Spirit Checklist ..... 4

28    Table S3. Trial centres and investigators ..... 9

29    Table S4. Combination tears ..... 10

30    Table S5. Interventions ..... 11

31    Table S6. Secondary outcomes ..... 12

32    Table S7. Baseline assessment..... 13

33    Table S8. Data Sharing Statement ..... 14

34    World Health Organization Trial Registration Data Set..... 15

35    REFERENCES ..... 17

36

37

Table S1. Palmer’s classification for TFCC ruptures

| Palmer[1] Class 1: Traumatic |                     | Palmer Class 2: Degenerative |                                   |
|------------------------------|---------------------|------------------------------|-----------------------------------|
| 1A                           | Central perforation | 2A                           | TFCC wear                         |
| 1B                           | Ulnar tear          | 2B                           | 2A + chondromalacia               |
| 1C                           | Distal tear         | 2C                           | 2B + central perforation          |
| 1D                           | Radial tear         | 2D                           | 2C + lunotriquetral ligament tear |
|                              |                     | 2E                           | 2D + ulnocarpal arthritis         |

TFCC, triangular fibrocartilage complex

Table S2. Spirit Checklist

| Reporting Item                                          |     |                                                                                                                                                                                                                                                                                          | Page Number |
|---------------------------------------------------------|-----|------------------------------------------------------------------------------------------------------------------------------------------------------------------------------------------------------------------------------------------------------------------------------------------|-------------|
| Administrative information                              |     |                                                                                                                                                                                                                                                                                          |             |
| Title                                                   | #1  | Descriptive title identifying the study design, population, interventions, and, if applicable, trial acronym                                                                                                                                                                             | 1           |
| Trial registration                                      | #2a | Trial identifier and registry name. If not yet registered, name of intended registry                                                                                                                                                                                                     | 4&16        |
| Trial registration: data set                            | #2b | All items from the World Health Organization Trial Registration Data Set                                                                                                                                                                                                                 | SM I 15-16  |
| Protocol version                                        | #3  | Date and version identifier                                                                                                                                                                                                                                                              | 3           |
| Funding                                                 | #4  | Sources and types of financial, material, and other support                                                                                                                                                                                                                              | 22          |
| Roles and responsibilities: contributorship             | #5a | Names, affiliations, and roles of protocol contributors                                                                                                                                                                                                                                  | 1&23        |
| Roles and responsibilities: sponsor contact information | #5b | Name and contact information for the trial sponsor                                                                                                                                                                                                                                       | 2           |
| Roles and responsibilities: sponsor and funder          | #5c | Role of study sponsor and funders, if any, in study design; collection, management, analysis, and interpretation of data; writing of the report; and the decision to submit the report for publication, including whether they will have ultimate authority over any of these activities | 23          |
| Roles and responsibilities: committees                  | #5d | Composition, roles, and responsibilities of the coordinating centre, steering committee, endpoint adjudication committee, data management team, and other individuals or groups overseeing the trial, if applicable (see Item 21a for data monitoring committee)                         | 3           |
| Introduction                                            |     |                                                                                                                                                                                                                                                                                          |             |
| Background and rationale                                | #6a | Description of research question and justification for undertaking the trial, including summary of relevant studies (published and unpublished) examining benefits and harms for each intervention                                                                                       | 6-7         |
| Background and rationale: choice of comparators         | #6b | Explanation for choice of comparators                                                                                                                                                                                                                                                    | 6-7         |
| Objectives                                              | #7  | Specific objectives or hypotheses                                                                                                                                                                                                                                                        | 7           |
| Trial design                                            | #8  | Description of trial design including type of trial (eg, parallel group, crossover, factorial, single group), allocation ratio, and framework (eg, superiority, equivalence, non-inferiority, exploratory)                                                                               | 7           |

| <b>Methods: Participants, interventions, and outcomes</b>           |                      |                                                                                                                                                                                                                                                                                                                                                                                |                     |
|---------------------------------------------------------------------|----------------------|--------------------------------------------------------------------------------------------------------------------------------------------------------------------------------------------------------------------------------------------------------------------------------------------------------------------------------------------------------------------------------|---------------------|
| Study setting                                                       | <a href="#">#9</a>   | Description of study settings (eg, community clinic, academic hospital) and list of countries where data will be collected. Reference to where list of study sites can be obtained                                                                                                                                                                                             | 8&SM I T3           |
| Eligibility criteria                                                | <a href="#">#10</a>  | Inclusion and exclusion criteria for participants. If applicable, eligibility criteria for study centres and individuals who will perform the interventions (eg, surgeons, psychotherapists)                                                                                                                                                                                   | 8-9                 |
| Interventions: description                                          | <a href="#">#11a</a> | Interventions for each group with sufficient detail to allow replication, including how and when they will be administered                                                                                                                                                                                                                                                     | 9-10&SA T5          |
| Interventions: modifications                                        | <a href="#">#11b</a> | Criteria for discontinuing or modifying allocated interventions for a given trial participant (eg, drug dose change in response to harms, participant request, or improving / worsening disease)                                                                                                                                                                               | 10                  |
| Interventions: adherence                                            | <a href="#">#11c</a> | Strategies to improve adherence to intervention protocols, and any procedures for monitoring adherence (eg, drug tablet return; laboratory tests)                                                                                                                                                                                                                              | 9-10                |
| Interventions: concomitant care                                     | <a href="#">#11d</a> | Relevant concomitant care and interventions that are permitted or prohibited during the trial                                                                                                                                                                                                                                                                                  | 9-10&SM I T5        |
| Outcomes                                                            | <a href="#">#12</a>  | Primary, secondary, and other outcomes, including the specific measurement variable (eg, systolic blood pressure), analysis metric (eg, change from baseline, final value, time to event), method of aggregation (eg, median, proportion), and time point for each outcome. Explanation of the clinical relevance of chosen efficacy and harm outcomes is strongly recommended | 10-11&SM I T6       |
| Participant timeline                                                | <a href="#">#13</a>  | Time schedule of enrolment, interventions (including any run-ins and washouts), assessments, and visits for participants. A schematic diagram is highly recommended (see Figure)                                                                                                                                                                                               | 7-8, 12&Figure 1- 2 |
| Sample size                                                         | <a href="#">#14</a>  | Estimated number of participants needed to achieve study objectives and how it was determined, including clinical and statistical assumptions supporting any sample size calculations                                                                                                                                                                                          | 11-12               |
| Recruitment                                                         | <a href="#">#15</a>  | Strategies for achieving adequate participant enrolment to reach target sample size                                                                                                                                                                                                                                                                                            | 12                  |
| <b>Methods: Assignment of interventions (for controlled trials)</b> |                      |                                                                                                                                                                                                                                                                                                                                                                                |                     |
| Allocation: sequence generation                                     | <a href="#">#16a</a> | Method of generating the allocation sequence (eg, computer-generated random numbers), and list of any factors for stratification. To reduce predictability of a random sequence, details of any planned restriction (eg, blocking) should be provided in a separate document that is unavailable to those who enrol participants or assign interventions                       | 12-13               |

|                                                           |                      |                                                                                                                                                                                                                                                                                                                                                                                                              |           |
|-----------------------------------------------------------|----------------------|--------------------------------------------------------------------------------------------------------------------------------------------------------------------------------------------------------------------------------------------------------------------------------------------------------------------------------------------------------------------------------------------------------------|-----------|
| Allocation concealment mechanism                          | <a href="#">#16b</a> | Mechanism of implementing the allocation sequence (eg, central telephone; sequentially numbered, opaque, sealed envelopes), describing any steps to conceal the sequence until interventions are assigned                                                                                                                                                                                                    | 12-13     |
| Allocation: implementation                                | <a href="#">#16c</a> | Who will generate the allocation sequence, who will enrol participants, and who will assign participants to interventions                                                                                                                                                                                                                                                                                    | 12-13     |
| Blinding (masking)                                        | <a href="#">#17a</a> | Who will be blinded after assignment to interventions (eg, trial participants, care providers, outcome assessors, data analysts), and how                                                                                                                                                                                                                                                                    | 12-13     |
| Blinding (masking): emergency unblinding                  | <a href="#">#17b</a> | If blinded, circumstances under which unblinding is permissible, and procedure for revealing a participant's allocated intervention during the trial                                                                                                                                                                                                                                                         | 13-14     |
| <b>Methods: Data collection, management, and analysis</b> |                      |                                                                                                                                                                                                                                                                                                                                                                                                              |           |
| Data collection plan                                      | <a href="#">#18a</a> | Plans for assessment and collection of outcome, baseline, and other trial data, including any related processes to promote data quality (eg, duplicate measurements, training of assessors) and a description of study instruments (eg, questionnaires, laboratory tests) along with their reliability and validity, if known. Reference to where data collection forms can be found, if not in the protocol | 14        |
| Data collection plan: retention                           | <a href="#">#18b</a> | Plans to promote participant retention and complete follow-up, including list of any outcome data to be collected for participants who discontinue or deviate from intervention protocols                                                                                                                                                                                                                    | 9-10      |
| Data management                                           | <a href="#">#19</a>  | Plans for data entry, coding, security, and storage, including any related processes to promote data quality (eg, double data entry; range checks for data values). Reference to where details of data management procedures can be found, if not in the protocol                                                                                                                                            | 14        |
| Statistics: outcomes                                      | <a href="#">#20a</a> | Statistical methods for analysing primary and secondary outcomes. Reference to where other details of the statistical analysis plan can be found, if not in the protocol                                                                                                                                                                                                                                     | 14-15&SAP |
| Statistics: additional analyses                           | <a href="#">#20b</a> | Methods for any additional analyses (eg, subgroup and adjusted analyses)                                                                                                                                                                                                                                                                                                                                     | 15-16&SAP |
| Statistics: analysis population and missing data          | <a href="#">#20c</a> | Definition of analysis population relating to protocol non-adherence (eg, as randomised analysis), and any statistical methods to handle missing data (eg, multiple imputation)                                                                                                                                                                                                                              | 14-15&SAP |
| <b>Methods: Monitoring</b>                                |                      |                                                                                                                                                                                                                                                                                                                                                                                                              |           |
| Data monitoring: formal committee                         | <a href="#">#21a</a> | Composition of data monitoring committee (DMC); summary of its role and reporting structure; statement of whether it is independent                                                                                                                                                                                                                                                                          | 16-17     |

|                                      |                      |                                                                                                                                                                                                                                                                                     |            |
|--------------------------------------|----------------------|-------------------------------------------------------------------------------------------------------------------------------------------------------------------------------------------------------------------------------------------------------------------------------------|------------|
|                                      |                      | from the sponsor and competing interests; and reference to where further details about its charter can be found, if not in the protocol. Alternatively, an explanation of why a DMC is not needed                                                                                   |            |
| Data monitoring: interim analysis    | <a href="#">#21b</a> | Description of any interim analyses and stopping guidelines, including who will have access to these interim results and make the final decision to terminate the trial                                                                                                             | 16         |
| Harms                                | <a href="#">#22</a>  | Plans for collecting, assessing, reporting, and managing solicited and spontaneously reported adverse events and other unintended effects of trial interventions or trial conduct                                                                                                   | 17&SI T6   |
| Auditing                             | <a href="#">#23</a>  | Frequency and procedures for auditing trial conduct, if any, and whether the process will be independent from investigators and the sponsor                                                                                                                                         | 17         |
| <b>Ethics and dissemination</b>      |                      |                                                                                                                                                                                                                                                                                     |            |
| Research ethics approval             | <a href="#">#24</a>  | Plans for seeking research ethics committee / institutional review board (REC / IRB) approval                                                                                                                                                                                       | 18         |
| Protocol amendments                  | <a href="#">#25</a>  | Plans for communicating important protocol modifications (eg, changes to eligibility criteria, outcomes, analyses) to relevant parties (eg, investigators, REC / IRBs, trial participants, trial registries, journals, regulators)                                                  | 18         |
| Consent or assent                    | <a href="#">#26a</a> | Who will obtain informed consent or assent from potential trial participants or authorised surrogates, and how (see Item 32)                                                                                                                                                        | 19         |
| Consent or assent: ancillary studies | <a href="#">#26b</a> | Additional consent provisions for collection and use of participant data and biological specimens in ancillary studies, if applicable                                                                                                                                               | Not needed |
| Confidentiality                      | <a href="#">#27</a>  | How personal information about potential and enrolled participants will be collected, shared, and maintained in order to protect confidentiality before, during, and after the trial                                                                                                | 18-20      |
| Declaration of interests             | <a href="#">#28</a>  | Financial and other competing interests for principal investigators for the overall trial and each study site                                                                                                                                                                       | 22-23      |
| Data access                          | <a href="#">#29</a>  | Statement of who will have access to the final trial dataset, and disclosure of contractual agreements that limit such access for investigators                                                                                                                                     | 19-20      |
| Ancillary and post trial care        | <a href="#">#30</a>  | Provisions, if any, for ancillary and post-trial care, and for compensation to those who suffer harm from trial participation                                                                                                                                                       | 17&SM I T6 |
| Dissemination policy: trial results  | <a href="#">#31a</a> | Plans for investigators and sponsor to communicate trial results to participants, healthcare professionals, the public, and other relevant groups (eg, via publication, reporting in results databases, or other data sharing arrangements), including any publication restrictions | 18-20      |
| Dissemination                        | <a href="#">#31b</a> | Authorship eligibility guidelines and any intended                                                                                                                                                                                                                                  | 19-20      |

|                                             |                      |                                                                                                                                                                                                |                      |
|---------------------------------------------|----------------------|------------------------------------------------------------------------------------------------------------------------------------------------------------------------------------------------|----------------------|
| policy: authorship                          |                      | use of professional writers                                                                                                                                                                    |                      |
| Dissemination policy: reproducible research | <a href="#">#31c</a> | Plans, if any, for granting public access to the full protocol, participant-level dataset, and statistical code                                                                                | 18-20&SM I T8        |
| Appendices                                  |                      |                                                                                                                                                                                                |                      |
| Informed consent materials                  | <a href="#">#32</a>  | Model consent form and other related documentation given to participants and authorised surrogates                                                                                             | Please see the notes |
| Biological specimens                        | <a href="#">#33</a>  | Plans for collection, laboratory evaluation, and storage of biological specimens for genetic or molecular analysis in the current trial and for future use in ancillary studies, if applicable | Not needed           |

- 47 Notes:
- 48 • The patient information and consent form, visual analogue scale of wrist pain, and moni-
- 49 toring plan will be included in the protocol and uploaded to clinicaltrials.gov.
- 50 • This checklist was completed on 30. October 2023 using <https://www.goodreports.org/>,
- 51 a tool made by the [EQUATOR Network](#) in collaboration with [Penelope.ai](#)
- 52
- 53 SM, supplementary material



Table S3. Trial centres and investigators

| Name                   | Role  | Center                                                                 |
|------------------------|-------|------------------------------------------------------------------------|
| Turkka Anttila         | Co-PI | Helsinki University Hospital, Helsinki, Finland                        |
| Robert Gvozdenovic     | Co-PI | Herlev/Gentofte University Hospital of Copenhagen, Copenhagen, Denmark |
| Matti Juntunen         | DI    | Kuopio University Hospital, Kuopio, Finland                            |
| Antti Kaivorinne       | Co-PI | Tampere University Hospital, Tampere, Finland                          |
| Olli-Pekka Kangasniemi | DI    | Hospital Nova of Central Finland, Jyväskylä, Finland                   |
| Teemu Karjalainen      | Co-PI | Hospital Nova of Central Finland, Jyväskylä, Finland                   |
| Morten Kjaer           | DI    | Herlev/Gentofte University Hospital of Copenhagen, Copenhagen, Denmark |
| Toni Luukkala          | DI    | Hospital Nova of Central Finland, Jyväskylä, Finland                   |
| Patrick Luukinen       | DI    | Tampere University Hospital, Tampere, Finland                          |
| Heli Lähdeniemi        | DI    | Turku University Hospital, Turku, Finland                              |
| Panu Nordback          | DI    | Helsinki University Hospital, Helsinki, Finland                        |
| Annele Pönkkö          | Co-PI | Oulu University Hospital, Oulu, Finland                                |
| Shabir Rashidi         | DI    | Hospital Sønderjylland, Sønderborg, Denmark                            |
| Mikko Räisänen         | Co-PI | Kuopio University Hospital, Kuopio, Finland                            |
| Janne Soikkeli         | DI    | Oulu University Hospital, Oulu, Finland                                |
| Jerzy Stiasny          | Co-PI | Hospital Sønderjylland, Sønderborg, Denmark                            |
| Elin Sward             | DI    | Karolinska Institute, Stockholm, Sweden                                |
| Tuukka Tanskanen       | Co-PI | Turku University Hospital, Turku, Finland                              |
| Lars Vadstrup          | DI    | Herlev/Gentofte University Hospital of Copenhagen, Copenhagen, Denmark |
| Johanna Vonkieseritzky | DI    | Karolinska Institute, Stockholm, Sweden                                |
| Maria Wilcke           | Co-PI | Karolinska Institute, Stockholm, Sweden                                |

Co-PI, Co-principal investigators; DI, deputy investigator

Table S4. Combination tears

| Primary tear*               | Secondary tear <sup>†</sup> | Action                                                 |
|-----------------------------|-----------------------------|--------------------------------------------------------|
| Central (1A) or radial (1D) | Ulnar (1B)                  | Will be randomised as central (1A) or radial (1D) tear |
| Ulnar (1B)                  | Central (1A) or radial (1D) | Will be randomised as ulnar (1B) tear                  |
| Distal (1C)                 | Ulnar (1B)                  | Excluded                                               |
| Distal (1C)                 | Central (1A) or radial (1D) | Excluded                                               |
| Central (1A) or radial (1D) | Distal (1C)                 | Will be randomised as central (1A) or radial (1D) tear |
| Ulnar (1B)                  | Distal (1C)                 | Will be randomised as ulnar (1B) tear                  |

<sup>\*</sup>The surgeon estimates that the tear in question is primarily responsible for the patient's symptoms.  
<sup>†</sup>The surgeon estimates that the tear in question does not remarkable contribute to the patient's symptoms.

Table S5. Interventions

| TFCC Tear                     | Intervention                                                                                                                                                                                                                                                                                                                                                                                                                                                                                                                                                                                                                                                                                                                                                                                                                                                                                                                                                                                                  |                                                                                      |
|-------------------------------|---------------------------------------------------------------------------------------------------------------------------------------------------------------------------------------------------------------------------------------------------------------------------------------------------------------------------------------------------------------------------------------------------------------------------------------------------------------------------------------------------------------------------------------------------------------------------------------------------------------------------------------------------------------------------------------------------------------------------------------------------------------------------------------------------------------------------------------------------------------------------------------------------------------------------------------------------------------------------------------------------------------|--------------------------------------------------------------------------------------|
| Central (1A)* or radial (1D)* | Wrist arthroscopy can be performed dry or wet, at the surgeon's discretion. In the debridement arm, the TFCC tear is debrided with a shaver. Portals are closed either with sutures or with medical tape. Immediate mobilisation of the wrist is allowed after the operation. Participants are provided with instructions for home exercises, and they are advised to commence the exercises two weeks post-operation. In the placebo surgery arm, the TFCC tear is left untouched, and no further interventions are performed. Portals are closed in a similar fashion to the debridement arm. The postoperative treatment is identical to that of the debridement arm group. If the patient requires treatment after the trial has concluded, they will receive care according to the standard healthcare procedures of their respective countries.                                                                                                                                                         |   |
| Ulnar tear (1B)*              | Wrist arthroscopy can be performed dry or wet, at the surgeon's discretion. In the repair arm, the TFCC is sutured to the capsule or fovea with a method chosen by the surgeon (arthroscopic or open). Acceptable methods include TFCC fixation through the capsule, bone tunnel, or via a suture anchor. Wounds are closed, followed by the application of an above-elbow cast or orthosis. Standardized post-operative treatment (physiotherapy) will commence after six-weeks. In physiotherapy arm, only diagnostic arthroscopy is performed: the tear is left untouched, and no further interventions are done. Portals are closed. Participant will wear a below-elbow cast or orthosis for two-weeks, followed by standardised protocol of physiotherapy exercises for the wrist and DRUJ stabilisers starting after two weeks. If the patient requires treatment after the trial has concluded, they will receive care according to the standard healthcare procedures of their respective countries. |  |

\* Palmer classification[1]: 1A, central; 1B, ulnar; and 1D, radial

TFCC, triangular fibrocartilage complex; DRUJ; distal radioulnar joint

Table S6. Secondary outcomes

| Outcome                  | Definition                                                                                                                                                                                                                                                                                                                                                                                                                                                                                                                                                                                                                                                                                                                                                                                                                                                                                                                                                                                                                                                                                                         |
|--------------------------|--------------------------------------------------------------------------------------------------------------------------------------------------------------------------------------------------------------------------------------------------------------------------------------------------------------------------------------------------------------------------------------------------------------------------------------------------------------------------------------------------------------------------------------------------------------------------------------------------------------------------------------------------------------------------------------------------------------------------------------------------------------------------------------------------------------------------------------------------------------------------------------------------------------------------------------------------------------------------------------------------------------------------------------------------------------------------------------------------------------------|
| PRWE                     | The PRWE questionnaire is a wrist-specific instrument comprising a 15-item questionnaire assessing pain and disability in daily living. PRWE provides a score ranging from 0 (best) to 100 (worst). This wrist-specific tool demonstrates good reliability, validity, and responsiveness.[2,3] Translation and validation have been conducted for Danish, Finnish, and Swedish languages. In interpreting the results, we will employ the Minimally Important Difference (MID) value of 14.[4] PRWE as secondary outcome will be measured at all the other time points (6-months, 2-, 5- and 10-years) than primary outcome.                                                                                                                                                                                                                                                                                                                                                                                                                                                                                       |
| Quality of life          | The generic health-related quality of life questionnaire utilised in this trial is the EQ-5D-3L[5], a widely employed instrument comprising five dimensions and a visual VAS for health level. The five dimensions assessed by EQ-5D-3L include mobility, self-care, usual activities, pain/discomfort, and anxiety/depression. For each dimension, patients rate their current state on each dimension using a three-point scale, and the VAS scale ranges from 0 (worst) to 100 (best). Utility or preference weights, applied with an aggregation formula, yield a single index number used to evaluate overall health-related quality of life. The EQ-5D-3L has been proven to be a reliable[6] and validated tool, and it is widely used in healthcare research. The EQ-5D-3L has demonstrated good responsiveness in upper extremity conditions, such as distal radius fractures[7], its responsiveness in hand surgery has not been measured previously. The MID for the index is 0.085 and for the VAS 6.41.[8] Translation and validation for Danish, Finnish, and Swedish languages have been conducted. |
| AE                       | All wrist-related AEs will be documented: ligament, nerve, tendon, or vascular injury; fracture; CRPS; infection; chondral lesion; hematoma; or any other condition that can be attributed to the intervention. Participants are instructed to promptly notify the outpatient clinic at their centre if they detect a potential AE. Additionally, AEs will be assessed during each follow-up visit. Any events resulting in hospitalisation or death will be classified as SAE.                                                                                                                                                                                                                                                                                                                                                                                                                                                                                                                                                                                                                                    |
| Global improvement       | Patient-rated global improvement will be assessed using the question: “How would you rate the function and pain of your wrist compared to the situation before the treatment?” Participants will provide responses on a 7-step Likert scale, ranging from “Much worse” to “Much better.”. This global rating of the treatment effect offers a subjective evaluation of the participant's perception of the treatment's impact on their wrist condition. It enables participants to offer feedback on their overall experience and evaluate the practical significance of the treatment's effect on their wrist. The Likert scale, a simple and effective tool for assessing participant-evaluated global ratings, is widely used in clinical research.                                                                                                                                                                                                                                                                                                                                                             |
| Pain in activity         | Pain in use will be evaluated using the VAS, a validated and reliable tool for pain assessment.[9] It is widely employed in pain assessments, with the VAS scale ranging from 0 to 100 mm, with higher values indicating more severe pain. The MID for VAS-pain is reported to fall between 16-19 mm.[10]                                                                                                                                                                                                                                                                                                                                                                                                                                                                                                                                                                                                                                                                                                                                                                                                          |
| Grip strength            | Grip strength will be assessed using the Jamar dynamometer, known for its good within-instrument reliability (Spearman Rho correlation coefficient test 0.82).[11] The strength measurement will be performed with the handle in 2-position: with the elbow in 90° flexion and the arm in adduction. Results will be reported in kilograms. The MID of grip strength is reported to be 5.5 kg.[12]                                                                                                                                                                                                                                                                                                                                                                                                                                                                                                                                                                                                                                                                                                                 |
| ROM of forearm and wrist | Passive ROM of the forearm and wrist are commonly employed as outcomes in studies addressing the treatment of wrist pathologies. Prosupination, recorded as forearm ROM, will be measured with the elbow at 90° flexion. Wrist ROM measurements will include extension, flexion, ulnar deviation, and radial deviation. The MID for forearm and wrist ROM have not been determined.                                                                                                                                                                                                                                                                                                                                                                                                                                                                                                                                                                                                                                                                                                                                |

PRWE, Patient-Rated Wrist Evaluation; MID, minimal important difference; EQ-5D-3L, European Quality of Life 5 Dimensions 3 Level Version; VAS, visual analogue scale; AE, adverse event; SAE, serious adverse event; ROM, range of motion; CRPS, Complex regional pain syndrome; CRPS, complex regional pain syndrome

Table S7. Baseline assessment

| Characteristic                          | Variable                              |
|-----------------------------------------|---------------------------------------|
| Sex                                     | male/female                           |
| Age                                     | years (from 18 to 65 y)               |
| Hand dominance                          | left/right                            |
| Education                               | first/second/third level              |
| Occupation                              | never worked/blue-collar/white-collar |
| History of smoking                      | no/yes                                |
| Duration of symptoms                    | no/yes                                |
| Involved hand                           | left/right                            |
| PRWE                                    | questionnaire                         |
| EQ-5D-3L                                | questionnaire                         |
| pain (VAS) in use                       | questionnaire                         |
| ulnar variance                          | +/- mm, determined from x-ray         |
| passive ROM of the wrist and forearm    | degrees                               |
| previous injuries in symptomatic wrist  | no/yes*                               |
| previous surgeries to symptomatic wrist | no/yes†                               |

\* When the injury occurred and the mechanism behind it  
† When the operation occurred and details about which procedure was performed  
Y, years; PRWE, Patient-Rated Wrist Evaluation; EQ-5D-3L, European Quality of Life 5 Dimensions 3 Level Version; VAS, visual analogue scale; ROM, range of motion

90      Table S8. Data Sharing Statement

91

| Data Sharing Statement                                           |                                                                                                                                                                             |
|------------------------------------------------------------------|-----------------------------------------------------------------------------------------------------------------------------------------------------------------------------|
| Will individual data be available (including data dictionaries)? | Not before the trial has been finished                                                                                                                                      |
|                                                                  | 93                                                                                                                                                                          |
|                                                                  | 94                                                                                                                                                                          |
|                                                                  | 95                                                                                                                                                                          |
| What data in particular will be shared?                          | Pseudonymised raw data                                                                                                                                                      |
| What other documents will be available?                          | Trial Protocol*, Statistical Analysis Plan*, Informed Consent Form*, Analytic Code                                                                                          |
|                                                                  | 99                                                                                                                                                                          |
|                                                                  | 100                                                                                                                                                                         |
|                                                                  | 101                                                                                                                                                                         |
| When will data be available (start and end dates?)               | Anonymous patient level data will be available if the European Union regulations permit after the trial has been finished. The end date is estimated to be January 1, 2037. |
| With whom?                                                       | Researchers who provide a methodologically sound proposal, and viewers of the journal where article will be published.                                                      |
|                                                                  | 100                                                                                                                                                                         |
|                                                                  | 107                                                                                                                                                                         |
|                                                                  | 108                                                                                                                                                                         |
|                                                                  | 109                                                                                                                                                                         |
| For what types of analyses?                                      | To achieve aims in the approved proposal.                                                                                                                                   |
| By what mechanism will data be made available?                   | Proposals should be directed to ville.mattila@tuni.fi. To gain access, data requestors will need to sign a data access agreement.                                           |
|                                                                  | 111                                                                                                                                                                         |
|                                                                  | 112                                                                                                                                                                         |
|                                                                  | 113                                                                                                                                                                         |
|                                                                  | 114                                                                                                                                                                         |

115  
116      \* Will be published

World Health Organization Trial Registration Data Set

| Item                                             | Description                                                                                                                                                                                                                                                                                                                                                                                                                                                                                                                                                                                                                                                                                                                                                                                                   |
|--------------------------------------------------|---------------------------------------------------------------------------------------------------------------------------------------------------------------------------------------------------------------------------------------------------------------------------------------------------------------------------------------------------------------------------------------------------------------------------------------------------------------------------------------------------------------------------------------------------------------------------------------------------------------------------------------------------------------------------------------------------------------------------------------------------------------------------------------------------------------|
| 1. Primary registry and trial-identifying number | Clinicaltrials.gov, NCT04576169                                                                                                                                                                                                                                                                                                                                                                                                                                                                                                                                                                                                                                                                                                                                                                               |
| 2. Date of registration in primary registry      | 29 September, 2020                                                                                                                                                                                                                                                                                                                                                                                                                                                                                                                                                                                                                                                                                                                                                                                            |
| 3. Secondary identifying numbers                 | None                                                                                                                                                                                                                                                                                                                                                                                                                                                                                                                                                                                                                                                                                                                                                                                                          |
| 4. Sources of monetary or material support       | This trial was funded by The Finnish Society for Surgery of the Hand, The Finnish Medical Foundation, Foundation of Vappu Uuspää, Finance Finland and Government’s research funding. All funders are foundations, societies, or research funds.                                                                                                                                                                                                                                                                                                                                                                                                                                                                                                                                                               |
| 5. Primary sponsor                               | Tampere University Hospital, Elämänaukio, Kuntokatu 2, 33520 Tampere, Finland                                                                                                                                                                                                                                                                                                                                                                                                                                                                                                                                                                                                                                                                                                                                 |
| 6. Secondary sponsor(s)                          | University of Tampere, Kalevantie 4, 33100 Tampere, Finland                                                                                                                                                                                                                                                                                                                                                                                                                                                                                                                                                                                                                                                                                                                                                   |
| 7. Contact for public queries                    | Antti Kaivorinne (MD), +3583311611, antti.kaivorinne@pirha.fi, Elämänaukio, Kuntokatu 2, 33520 Tampere, Finland                                                                                                                                                                                                                                                                                                                                                                                                                                                                                                                                                                                                                                                                                               |
| 8. Contact for scientific queries                | Ville Mattila (MD, Professor), +3583311611, ville.mattila@tuni.fi, Elämänaukio, Kuntokatu 2, 33520 Tampere, Finland                                                                                                                                                                                                                                                                                                                                                                                                                                                                                                                                                                                                                                                                                           |
| 9. Public title                                  | Protocol for trial comparing treatment of triangular fibrocartilage complex tears                                                                                                                                                                                                                                                                                                                                                                                                                                                                                                                                                                                                                                                                                                                             |
| 10. Scientific title                             | tREatment of triangular FibrOcartilage ComplEx Ruptures (REINFORCER): Protocol for Randomised, Controlled, Blinded, Efficacy Trial of Triangular Fibrocartilage Complex Tears                                                                                                                                                                                                                                                                                                                                                                                                                                                                                                                                                                                                                                 |
| 11. Countries of recruitment                     | Denmark, Finland, and Sweden                                                                                                                                                                                                                                                                                                                                                                                                                                                                                                                                                                                                                                                                                                                                                                                  |
| 12. Health condition(s) or problem(s) studied    | TFCC Tears                                                                                                                                                                                                                                                                                                                                                                                                                                                                                                                                                                                                                                                                                                                                                                                                    |
| 13. Intervention(s)                              | <i>Central or Radial Tear:</i><br>Experimental comparator: Arthroscopic debridement<br>Placebo Comparator: Placebo surgery<br><br><i>Ulnar Tear:</i><br>Experimental Comparator: Arthroscopic or open repair<br>Active Comparator: Physiotherapy                                                                                                                                                                                                                                                                                                                                                                                                                                                                                                                                                              |
| 14. Key inclusion and exclusion criteria         | <i>Inclusion criteria:</i> ulnar sided wrist pain; age ≥ 18 years; suspicion of TFCC tear in clinical examination (MRI optional); ability to fill the Danish, Finnish, or Swedish versions of questionnaires; symptom duration more than three months and unsuccessful non-operative treatment; and central, radial or ulnar tear explaining the ulnar wrist pain in arthroscopy<br><br><i>Exclusion criteria:</i> age > 65 years; gross instability of DRUJ*; distal TFCC tear (Palmer 1C)[1] in arthroscopy; ulnocarpal or DRUJ arthrosis; ulnar variance ≥ +2 mm in native x-rays; RA or other inflammatory disease effecting radio- or ulnocarpal or DRUJ; lunotriquetral instability diagnosed in arthroscopy; ECU instability; or massive tear or degeneration that requires reconstruction of the TFCC |
| 15. Study type                                   | Interventional<br><br><i>Allocation:</i> Randomised                                                                                                                                                                                                                                                                                                                                                                                                                                                                                                                                                                                                                                                                                                                                                           |

*Masking:* Triple (participant, outcome assessors, and investigator) in central or radial tear, and single (investigator) in ulnar tear

*Interventional Study Model:* Parallel Assignment

*Primary Purpose:* Treatment efficacy

*Method of sequence generation and allocation concealment:* Internet based centralised allocation system (<https://www.randomizer.at>). The concealment of allocation is ensured, as the randomisation code will be released only after the diagnosis, and the investigators, care providers, and patients are not aware of the code

|                              |                                                                                                                                                                            |
|------------------------------|----------------------------------------------------------------------------------------------------------------------------------------------------------------------------|
| 16. Date of first enrolment  | 27 October 2020                                                                                                                                                            |
| 17. Target sample size       | 204                                                                                                                                                                        |
| 18. Recruitment status       | Recruiting                                                                                                                                                                 |
| 19. Primary outcome(s)       | PRWE at one year follow-up                                                                                                                                                 |
| 20. Key secondary outcome(s) | PRWE at other time points <sup>†</sup> , EQ-5D-3L, AEs, patient-rated global improvement, pain with VAS in stress grip strength, and ROM of forearm and wrist <sup>‡</sup> |

\* Will be defined as “obvious instability in clinical examination in each forearm and wrist position”

<sup>†</sup> six-months, two-, five- and 10-years follow-ups

<sup>‡</sup> six-months, one-, two-, five- and 10-years follow-ups

MD, Medical doctor; TFCC, Triangular fibrocartilage complex; MRI, magnetic resonance image; DRUJ, Distal radioulnar joint; mm, millimetres; RA, rheumatoid arthritis; ECU, Extensor carpi ulnaris; PRWE, Patient-Rated Wrist Evaluation; EQ-5D-3L, Euroqol Five Dimensions Three Level Questionnaire; AE, adverse event; VAS, Visual analogue scale; ROM, range of motion



## REFERENCES

- 1 Palmer AK. Triangular fibrocartilage complex lesions: a classification. *J Hand Surg Am*. 1989;14:594–606.
- 2 MacDermid JC, Turgeon T, Richards RS, *et al*. Patient rating of wrist pain and disability: a reliable and valid measurement tool. *J Orthop Trauma*. 1998;12:577–86. doi: 10.1097/00005131-199811000-00009
- 3 MacDermid JC, Richards RS, Donner A, *et al*. Responsiveness of the short form-36, disability of the arm, shoulder, and hand questionnaire, patient-rated wrist evaluation, and physical impairment measurements in evaluating recovery after a distal radius fracture. *J Hand Surg Am*. 2000;25:330–40. doi: 10.1053/jhsu.2000.jhsu25a0330
- 4 Sorensen AA, Howard D, Tan WH, *et al*. Minimal clinically important differences of 3 patient-rated outcomes instruments. *J Hand Surg Am*. 2013;38:641–9. doi: 10.1016/j.jhsa.2012.12.032
- 5 Greiner W, Weijnen T, Nieuwenhuizen M, *et al*. A single European currency for EQ-5D health states. Results from a six-country study. *Eur J Health Econ*. 2003;4:222–31. doi: 10.1007/s10198-003-0182-5
- 6 Hurst NP, Kind P, Ruta D, *et al*. Measuring health-related quality of life in rheumatoid arthritis: validity, responsiveness and reliability of EuroQol (EQ-5D). *Br J Rheumatol*. 1997;36:551–9.
- 7 Rundgren J, Enocson A, Mellstrand Navarro C, *et al*. Responsiveness of EQ-5D in Patients With a Distal Radius Fracture. *Hand (NY)*. 2018;13:572–80. doi: 10.1177/1558944717725378
- 8 Yapp LZ, Scott CEH, Howie CR, *et al*. Meaningful values of the EQ-5D-3L in patients undergoing primary knee arthroplasty. *Bone Joint Res*. 2022;11:619–28. doi: 10.1302/2046-3758.119.BJR-2022-0054.R1
- 9 Massy-Westropp N, Ahern M, Krishnan J. A visual analogue scale for assessment of the impact of rheumatoid arthritis in the hand: Validity and repeatability. *Journal of Hand Therapy*. 2005;18:30–3. doi: 10.1197/j.jht.2004.10.003
- 10 Randall DJ, Zhang Y, Li H, *et al*. Establishing the Minimal Clinically Important Difference and Substantial Clinical Benefit for the Pain Visual Analog Scale in a Postoperative Hand Surgery Population. *J Hand Surg Am*. 2022;47:645–53. doi: 10.1016/j.jhsa.2022.03.009
- 11 Hamilton GF, McDonald C, Chenier TC. Measurement of grip strength: validity and reliability of the sphygmomanometer and jamar grip dynamometer. *J Orthop Sports Phys Ther*. 1992;16:215–9.
- 12 Katz JN, Gelberman RH, Wright EA, *et al*. Responsiveness of self-reported and objective measures of disease severity in carpal tunnel syndrome. *Med Care*. 1994;32:1127–33. doi: 10.1097/00005650-199411000-00005
