# Supplementary material
Source: HighWire-hosted journal article supplement (https://bmjopen.bmj.com/content/14/12/e086102)
Supplement: inline-supplementary-material-6 [file inline-supplementary-material-6.pdf]

## Wrist joint triangular fibrocartilage tear

### VAS pain line

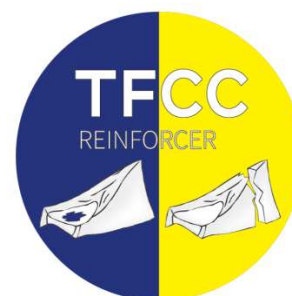

RESEARCH STUDY NUMBER: \_\_\_\_\_

PATIENT INITIALS: \_\_\_\_\_

DATE: \_\_\_\_\_

### Visual Analogue Scale (VAS) for pain measurement

This research study includes as one component the measurement of wrist pain. We ask you to assess the pain in the affected hand/hands in the last week. The scale below is called the Visual Analogue Scale (VAS). The scale is used in pain measurement so that one end of the scale represents the worst possible pain you can ever imagine and the other end represents a totally painless situation.

Draw a vertical cross line on the line below at the point that best describes the pain in your arm as a whole in the last week (line length 100 mm).

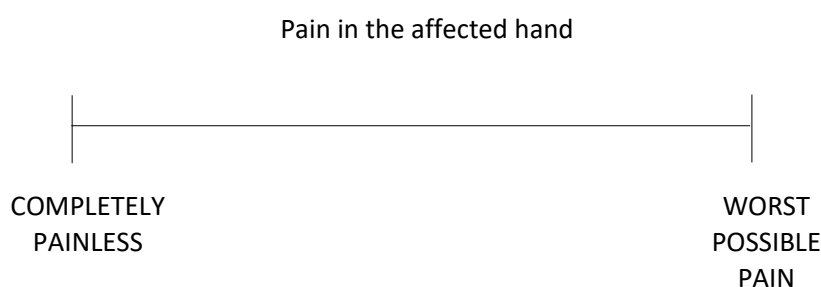

VAS measurement (to be filled in by the investigator)

Functional ability: \_\_\_\_\_ mm
